# Supplementary material
Source: PubMed Central journal article supplement (PMC9402501)
Supplement: 12325_2022_2215_MOESM2_ESM.pdf [file 12325_2022_2215_MOESM2_ESM.pdf]

# Real-world Reductions in Healthcare Resource Utilization (HCRU) Over 6 Months in Patients With Substance Use Disorders (SUDs) Treated With a Prescription Digital Therapeutic (PDT)

N Shah, FF Velez, S Colman, L Kauffman, C Ruetsch, K Anastassopoulos, YA Maricich. 2022

PEER-REVIEWED  
FEATURE

OPEN  
ACCESS

~41.1M<sup>1</sup>  
Americans  
with SUDs

~93.4%<sup>1</sup>  
do not receive  
treatment  
each year

reSET<sup>®</sup> is the **only FDA-authorized treatment** for patients with cocaine, cannabis, and stimulant use disorders.

This study evaluated real-world healthcare resource utilization (HCRU) and associated costs 6 months after initiation of reSET in patients with SUD.

Use of reSET by patients with SUD is associated with durable reductions in HCRU and lower healthcare costs over 6 months compared to the 6 months before PDT treatment, providing an economic benefit to the healthcare system.

## Significant Decreases Observed Between Pre-index and Post-index reSET Cohort<sup>2</sup>

Overall Hospital Encounters

50%

IRR: 0.50;  
95% CI: 0.37-0.67;  
P<0.001

Inpatient Stays

56%

IRR: 0.44; 95% CI: 0.26-0.76; P=0.003

Partial Hospitalizations

57%

IRR: 0.43; 95% CI: 0.21-0.88; P=0.021

Emergency Department

45%

IRR: .55; 95% CI: 0.38-0.80; P<0.004

Additional Results

E and M\* Consultations

91%

IRR: 0.09; 95% CI: 0.02-0.36, P<0.001

Cardiovascular Procedures

72%

IRR: 0.28; 95% CI: 0.14-0.55, P<0.001

Radiology Services

52%

IRR: 0.48; 95% CI: 0.31-0.76, P=0.002

Reductions in facility-encounter HCRU drove 6-month reSET per-patient cost reductions of **\$3,591** post-index compared to pre-index.

**Methods:** A retrospective analysis of HealthVerity PrivateSource20 data compared the 6-month incidence of all-cause hospital facility encounters and clinician services in patients treated with reSET (reSET cohort) before (pre-index period) and after (post-index period) reSET initiation (index). Incidence was compared using incidence rate ratios (IRR). HCRU-related costs were also assessed.

\*Evaluation and Management

1. Substance Abuse and Mental Health Services Administration. (2021). *Key substance use and mental health indicators in the United States: Results from the 2020 National Survey on Drug Use and Health (PEP21-07-01-003, NSDUH Series H-56)*. Rockville, MD: Center for Behavioral Health Statistics and Quality, SAMHSA.

2. Median age 37 years, 50.5% female, 54.5% Medicaid-insured

Adis

Funded by Pear  
Therapeutics (US),  
Inc. June 2022

The infographic represents the opinions of the authors. For a full list of declarations, including funding and author disclosure statements, please see the full text online. © The authors, CC-BY-NC 2022.
